# Supplementary material
Source: ML conference proceedings conference paper supplement (https://openreview.net/forum?id=vJbyT9bYgf)
Supplement: supplementary_material [file attachment]

# Supplementary Materials: QS-NeRV: Real-Time Quality-Scalable Decoding with Neural Representation for Videos

Anonymous Authors

## 1 ARCHITECTURE DETAILS OF SDMN

### 1.1 Decoder

The detailed network settings of SDMN decoder are displayed in Table 3. Assuming that the shape of the embedding  $E_t^{L0}$  is  $C_0 \times h_0 \times w_0$ , the channel will be expanded by a convolutional layer to  $C_{init}$  at first. Then, the expanded features are decoded progressively by five reparameterization-base decoding blocks. After being processed by the  $i$ -th block, where the kernel size and stride of convolution layers is  $Ks[i]$  and  $Strides[i]$ , the channel dimension of the output feature is  $Channels[i]$ , and the resolution will be enlarged by a factor of  $Strides[i]$ .

### 1.2 Invertible Skip Connection

The denseblock of invnets consists of five  $3 \times 3$  convolution layers. Each convolutional layer takes the concatenated result of the input of the block and all outputs of its previous convolution layers as input. It's worth noting that we only establish connections between the two layers with the smallest scales in the encoder and decoder to save the bitstream overhead. The shapes of the two frame-specific features  $\hat{f}_t$  transmitted in the connection for videos of different resolutions are presented in Table 1.

Table 1: The shape of  $\hat{f}_t$  for videos of different resolutions.

| Video resolution  | Shape ( $[c \times h \times w]$ )                                            |
|-------------------|------------------------------------------------------------------------------|
| $960 \times 480$  | $\begin{bmatrix} 1 \times 8 \times 16 \\ 1 \times 4 \times 8 \end{bmatrix}$  |
| $1920 \times 960$ | $\begin{bmatrix} 1 \times 12 \times 24 \\ 1 \times 4 \times 8 \end{bmatrix}$ |
| $1280 \times 640$ | $\begin{bmatrix} 1 \times 8 \times 16 \\ 1 \times 4 \times 8 \end{bmatrix}$  |

## 2 IMPLEMENT DETAILS OF VIDEO COMPRESSION

We use SHM 12.4, which is the official coding test tool of SHVC, to perform three-layer scalable video coding by following the command:

```
TAppEncoderStatic -c encoder_lowdelay_P_scalable.cfg -c layers.cfg -c VIDEO.cfg -q0 37 -q1 32 -q2 27 -b bitstream.bin
```

where  $q0$ ,  $q1$ , and  $q2$  denote the quantization parameters (QPs) set for BL, the first EL, and the second EL, respectively.

We follow the steps in [1] to generate the videos compressed by X264 and X265. We assign corresponding constant bitrates for different quality levels.

```
ffmpeg -i VIDEO/f%05d.png -c:v libx264 -preset medium -bf 0
```

```
-b:v BITRATE VIDEO.h264
```

```
ffmpeg -i VIDEO/f%05d.png -c:v libx265 -preset medium -x265-params bframes=0 -b:v BITRATE VIDEO.h265
```

where  $BITRATE$  is set to 5000k, 7500k, and 10000k corresponding to 3M, 4.5M, and 6M model sizes of INR-based approaches.

## 3 MORE ABLATION STUDY

### 3.1 Reparameterization-base Decoding Block

We compare the performance of our proposed reparameterization-base decoding block and HNeRV decoding block. As shown in Table 2, the results illustrate that reparameterization allows the network to get a stronger representation capability.

Table 2: Reparameterization-base vs. HNeRV decoding block in SDMN, *Beauty*.

| Decoding block | Reparameterization-base | HNeRV |
|----------------|-------------------------|-------|
| PSNR (dB)      | 33.92                   | 33.78 |

### 3.2 Model Quantization

We analyze the impact of model quantization on performance, and the results are shown in Table 4.

## 4 ADDITIONAL QUANTITATIVE RESULTS

Here, we provide video regression and interpolation results for all 22 sequences of the DAVIS dataset. The results are shown in Table 5.

## 5 ADDITIONAL QUALITATIVE RESULTS

We provide more video regression qualitative and video interpolation results of UVG dataset in Fig. 1 and 2.

## REFERENCES

- [1] Hao Chen, Bo He, Hanyu Wang, Yixuan Ren, Ser Nam Lim, and Abhinav Shrivastava. 2021. Nerv: Neural representations for videos. *Advances in Neural Information Processing Systems* 34 (2021), 21557–21568.

**Table 3: Architecture of SDMN decoder.**

| Resolution        | Size  | $C_0$ | $C_{init}$ | Channels             | Strides         | Ks              |
|-------------------|-------|-------|------------|----------------------|-----------------|-----------------|
| $960 \times 480$  | 3M    | 16    | 98         | [82, 68, 57, 48, 40] | [5, 4, 3, 2, 2] | [1, 3, 5, 5, 5] |
| $1920 \times 960$ | 3M    | 16    | 84         | [70, 58, 48, 40, 33] | [5, 4, 4, 3, 2] | [1, 3, 5, 5, 5] |
| $1280 \times 640$ | 0.75M | 12    | 43         | [36, 30, 24, 20, 17] | [5, 4, 4, 2, 2] | [1, 3, 5, 5, 5] |

**Table 4: Quantization ablations on  $1920 \times 960$  UVG in PSNR**

| Video       | Size | Beauty | Bosph | Bee   | Jockey | Ready | Shake | Yacht | avg.  |
|-------------|------|--------|-------|-------|--------|-------|-------|-------|-------|
| N/A         | 3M   | 33.92  | 35.74 | 39.27 | 33.83  | 27.67 | 35.04 | 29.97 | 33.63 |
| 8-bit Quant |      | 33.88  | 35.68 | 39.11 | 33.72  | 27.63 | 35.03 | 29.95 | 33.57 |
| N/A         | 4.5M | 34.11  | 36.69 | 39.38 | 34.89  | 28.75 | 35.68 | 30.94 | 34.35 |
| 8-bit Quant |      | 34.06  | 36.67 | 39.31 | 34.83  | 28.74 | 35.65 | 30.90 | 34.31 |

**Table 5: PSNR (dB) and SSIM on DAVIS at resolution  $1920 \times 960$ . Bold means best results.**

| Video          | Video Regression |             |                     |                    | Video Interpolation |                     |                    |
|----------------|------------------|-------------|---------------------|--------------------|---------------------|---------------------|--------------------|
|                | HNeRV            | DNeRV       | FFNeRV              | QS-NeRV            | DNeRV               | FFNeRV              | QS-NeRV            |
| Blackswan      | 30.35/0.891      | 30.20/0.898 | 30.64/0.940         | <b>32.78/0.942</b> | 27.40/0.834         | 26.30/0.786         | <b>30.31/0.902</b> |
| Bmx-bumps      | 29.98/0.872      | 31.38/0.903 | 32.00/ <b>0.937</b> | <b>33.21/0.932</b> | 25.17/0.755         | 26.02/ <b>0.788</b> | <b>26.18/0.779</b> |
| Bmx-trees      | 28.76/0.861      | 28.64/0.858 | 29.06/0.912         | <b>31.08/0.917</b> | 24.95/0.755         | 25.18/0.725         | <b>25.65/0.755</b> |
| Breakdance     | 30.45/0.961      | 30.01/0.962 | 30.84/0.976         | <b>31.40/0.969</b> | 25.48/0.918         | 26.21/0.919         | <b>27.02/0.933</b> |
| Camel          | 26.71/0.844      | 26.51/0.862 | 27.16/0.911         | <b>27.35/0.879</b> | 25.14/0.831         | 25.20/ <b>0.857</b> | <b>25.82/0.844</b> |
| Car-round      | 27.75/0.912      | 28.04/0.917 | <b>29.43/0.952</b>  | 29.11/0.930        | 24.70/0.859         | 27.72/0.932         | <b>25.11/0.863</b> |
| Car-shadow     | 31.32/0.936      | 30.23/0.924 | 33.06/ <b>0.964</b> | <b>33.89/0.954</b> | 26.29/0.872         | 27.63/0.883         | <b>29.70/0.927</b> |
| Car-turn       | 29.65/0.879      | 29.67/0.878 | 30.30/ <b>0.915</b> | <b>31.12/0.910</b> | 26.91/0.813         | 27.00/0.829         | <b>28.17/0.833</b> |
| Cows           | 24.11/0.792      | 24.29/0.798 | 22.36/0.707         | <b>25.13/0.842</b> | 23.06/0.752         | 22.36/0.707         | <b>24.36/0.821</b> |
| Dance-twirl    | 28.19/0.845      | 28.31/0.847 | 28.09/ <b>0.896</b> | <b>29.23/0.869</b> | 23.50/0.717         | 24.07/0.761         | <b>25.42/0.788</b> |
| Dog            | 30.96/0.898      | 31.10/0.900 | 31.22/0.936         | <b>33.35/0.943</b> | 26.36/0.724         | 26.95/0.757         | <b>28.69/0.798</b> |
| Dog-ag         | 28.75/0.893      | 29.91/0.921 | <b>34.57/0.982</b>  | 32.97/0.960        | 23.99/0.825         | <b>29.77/0.935</b>  | 25.09/0.835        |
| Drift-straight | 30.80/0.932      | 30.56/0.928 | 31.29/0.962         | <b>34.24/0.968</b> | 23.72/0.726         | 24.90/0.730         | <b>25.63/0.738</b> |
| Drift-turn     | 29.72/0.834      | 29.99/0.844 | 30.43/0.813         | <b>31.76/0.885</b> | 24.00/0.696         | 23.36/0.683         | <b>25.56/0.728</b> |
| Goat           | 26.62/0.858      | 26.90/0.863 | 25.62/0.875         | <b>28.61/0.906</b> | 22.27/0.634         | 22.06/0.650         | <b>24.65/0.761</b> |
| Libby          | 32.69/0.917      | 33.17/0.925 | 33.03/0.948         | <b>35.11/0.952</b> | 27.35/0.761         | <b>28.04/0.830</b>  | 27.54/0.699        |
| Mallard-fly    | 29.22/0.848      | 28.98/0.839 | 29.89/ <b>0.915</b> | <b>30.88/0.897</b> | 24.58/0.684         | 25.14/ <b>0.724</b> | <b>25.51/0.711</b> |
| Mallard-water  | 29.08/0.908      | 29.32/0.912 | 28.87/0.931         | <b>30.90/0.936</b> | 23.19/0.717         | 23.72/0.742         | <b>25.10/0.769</b> |
| Parkour        | 26.56/0.851      | 26.69/0.853 | 26.97/0.874         | <b>28.01/0.891</b> | 23.31/0.739         | 23.85/0.774         | <b>24.55/0.791</b> |
| Rollerblade    | 32.19/0.935      | 32.32/0.938 | <b>34.77/0.971</b>  | 34.54/0.959        | 26.11/0.813         | 27.81/ <b>0.849</b> | <b>27.87/0.834</b> |
| Scooter-black  | 27.38/0.923      | 27.86/0.932 | 27.75/0.954         | <b>31.26/0.961</b> | 20.69/0.708         | 21.90/0.719         | <b>22.92/0.750</b> |
| Stroller       | 31.31/0.894      | 31.64/0.906 | 32.13/0.945         | <b>33.08/0.934</b> | 26.76/0.789         | 26.93/0.795         | <b>28.01/0.818</b> |
| Average        | 29.21/0.886      | 29.35/0.891 | 29.98/0.919         | <b>31.31/0.924</b> | 24.77/0.769         | 25.58/0.790         | <b>26.31/0.804</b> |

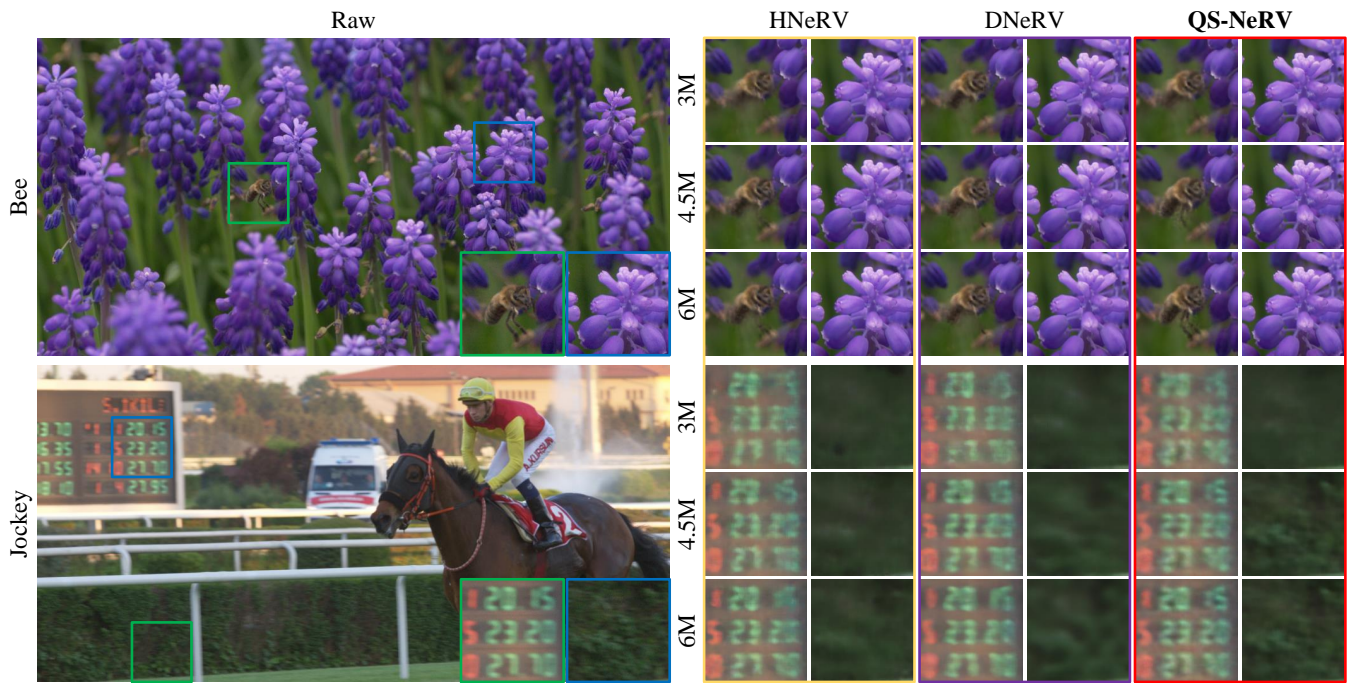

Figure 1: More visualization of video neural representations at various model sizes.

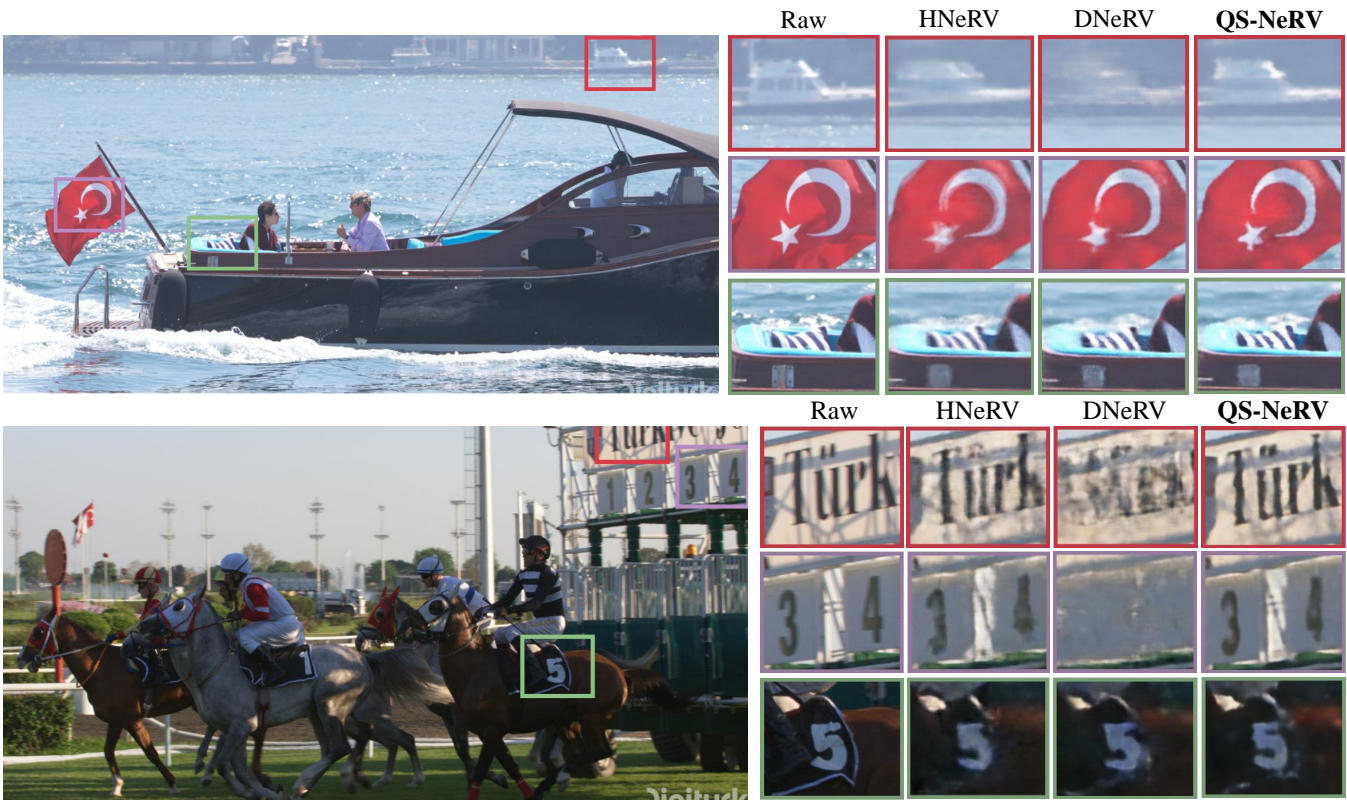

Figure 2: More visualization of video interpolation at 3M model size.
